# Supplementary material for: A super pan-genomic landscape of rice
Source: PubMed Central journal article supplement (PMC9525306; doi:10.1038/s41422-022-00685-z), 2022-07-12
Supplement: 41422_2022_685_MOESM6_ESM.pdf [file 41422_2022_685_MOESM6_ESM.pdf]

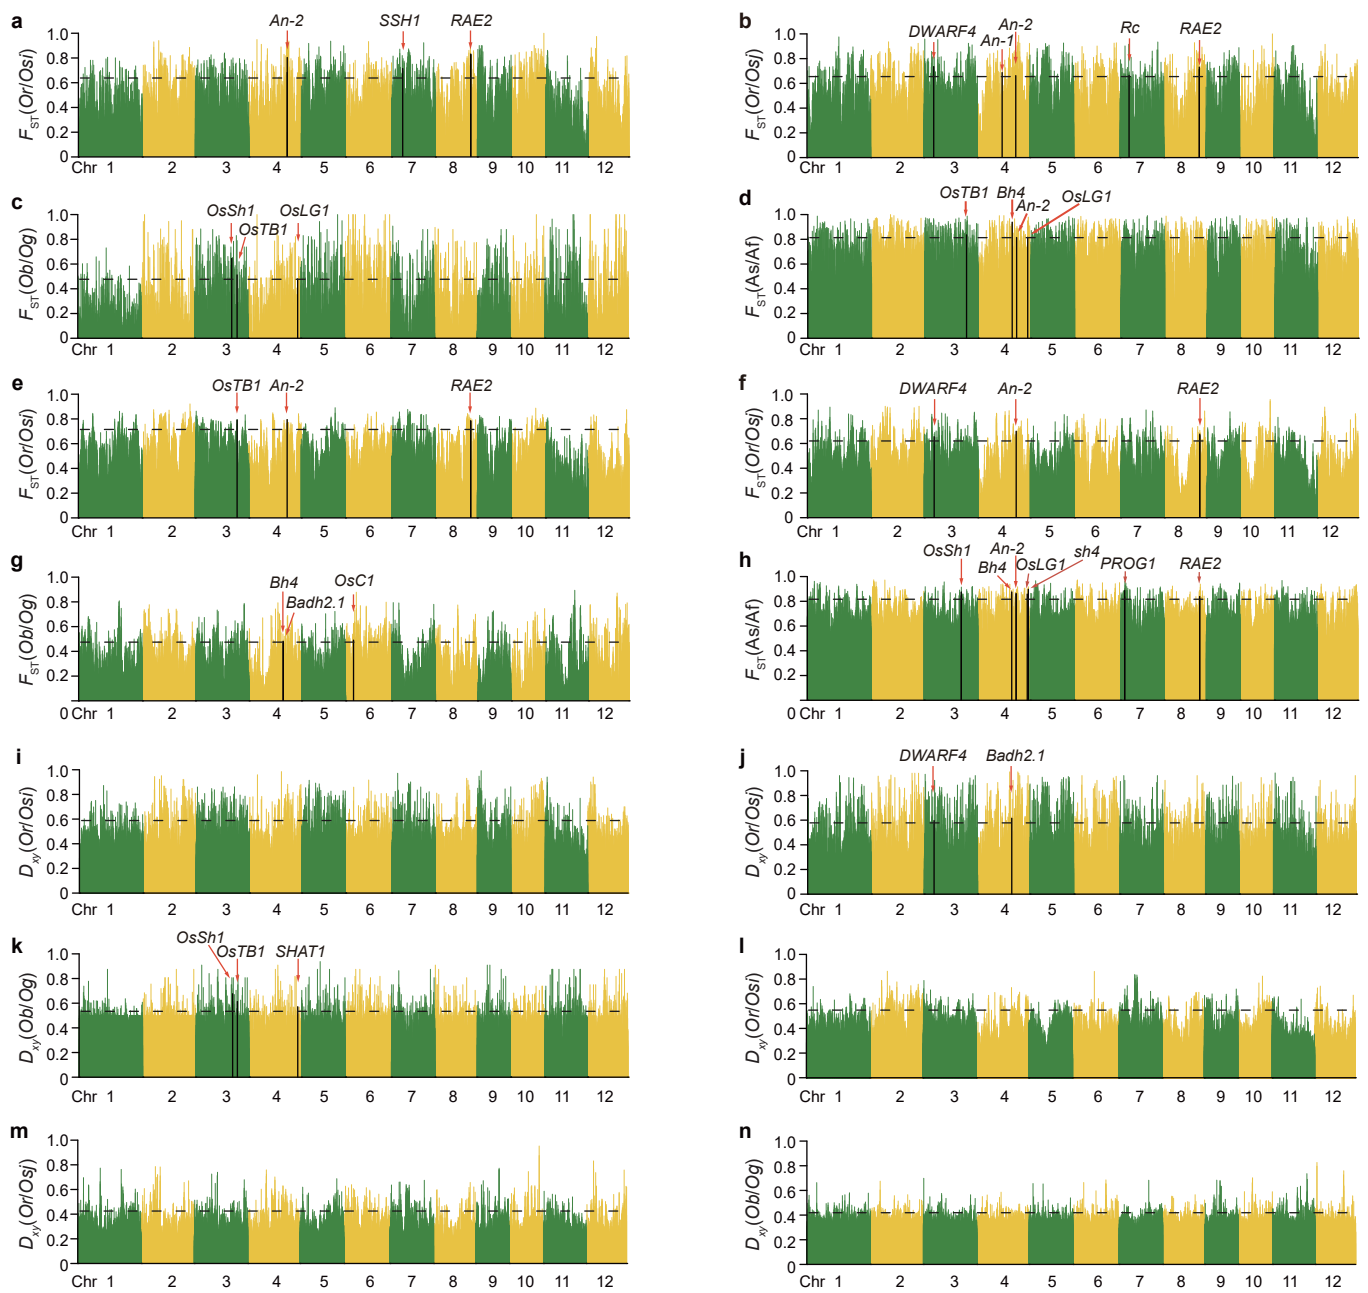

**Fig. S6. Genetic variations contribute to domestication in Asian and African rice.** a-d Divergent regions identified by  $F_{ST}$  using SVs: Manhattan plot of  $F_{ST}$  values between *Or* and *Osi* (a),  $F_{ST}$  values between *Or* and *Osj* (b),  $F_{ST}$  values between *Ob* and *Og* (c), and  $F_{ST}$  values between Asian and African rice (d). e-h Divergent regions identified by  $F_{ST}$  using SNPs: Manhattan plot of  $F_{ST}$  values between *Or* and *Osi* (e), between *Or* and *Osj* (f), between *Ob* and *Og* (g), and between Asian rice and African rice (h). i-k Divergent regions identified by  $D_{xy}$  using SVs: Manhattan plot of  $D_{xy}$  values between *Or* and *Osi* (i), between *Or* and *Osj* (j), and between *Ob* and *Og* (k). l-n Divergent regions identified by  $D_{xy}$  using SNPs: Manhattan plot of  $D_{xy}$  values between *Or* and *Osi* (l), between *Or* and *Osj* (m), and between *Ob* and *Og* (n). Manhattan plots are at 20 kb resolution; dashed lines indicate the top 5% of  $D_{xy}$  or  $F_{ST}$  values and black lines indicate known genes. *Osi*, *Osj*, *Or*, *Og*, and *Ob* refer to *O. sativa indica*, *O. sativa japonica*, *O. rufipogon*, *O. glaberrima*, and *O. barthii*, respectively.
